# Supplementary material for: Estimation of rate coefficients and branching ratios for gas-phase reactions of OH with aliphatic organic compounds for use in automated mechanism construction
Source: Copernicus journal article supplement (doi:10.5194/acp-18-9297-2018), 2018-07-04
Supplement: Supplementary file 1 [file acp-18-9297-2018-supplement.zip]

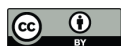

## *Supplement of*

# **Estimation of rate coefficients and branching ratios for gas-phase reactions of OH with aliphatic organic compounds for use in automated mechanism construction**

**Michael E. Jenkin et al.**

*Correspondence to:* Michael E. Jenkin ([atmos.chem@btinternet.com](mailto:atmos.chem@btinternet.com))

- [acp-18-9297-2018-supplement-title-page.pdf](#)
- [SI\\_1\\_OH\\_alkane\\_preferred data.xls](#)
- [SI\\_2\\_OH\\_saturated oxygenate\\_preferred data.xls](#)
- [SI\\_3\\_OH\\_alkene\\_preferred data.xls](#)
- [SI\\_4\\_OH\\_unsaturated oxygenate\\_preferred data.xls](#)
- [SI\\_5\\_OH\\_alkyne and alkynol\\_preferred data.xls](#)
- [Supplement aliphatic.pdf](#)

The copyright of individual parts of the supplement might differ from the CC BY 4.0 License.
