# Supplementary material for: Estimation of rate coefficients and branching ratios for gas-phase reactions of OH with aliphatic organic compounds for use in automated mechanism construction
Source: Copernicus journal article supplement (doi:10.5194/acp-18-9297-2018), 2018-07-04
Supplement: Supplementary file 2 [file acp-18-9297-2018-supplement.zip]

Archive with 7 entries (7 files):
- acp-18-9297-2018-supplement-title-page.pdf
- Supplement aliphatic.pdf
- SI_3_OH_alkene_preferred data.xls
- SI_1_OH_alkane_preferred data.xls
- SI_4_OH_unsaturated oxygenate_preferred data.xls
- SI_5_OH_alkyne and alkynol_preferred data.xls
- SI_2_OH_saturated oxygenate_preferred data.xls
