# Supplementary material for: Estimation of rate coefficients and branching ratios for gas-phase reactions of OH with aliphatic organic compounds for use in automated mechanism construction
Source: Copernicus journal article supplement (doi:10.5194/acp-18-9297-2018), 2018-07-04
Supplement: Supplementary file 2 [file acp-18-9297-2018-supplement.zip › SI_3_OH_alkene_preferred data.xls]

## Sheet: Notes
Pressure independent rate coefficients for OH + organic compounds
Rate coefficients in the form: k = A.exp(-E/RT) (i)
Notes on data table columns
Systematic name	systematic name of organic compound, usually based on IUPAC nomenclature
Alternative name	alternative/common names for organic compound
Carbon number	the number of carbon atoms in the organic compound
SMILES:	SMILES notation for organic compound				http://www.daylight.com/smiles/index.html
InChI:	InChI notation for organic compound				http://iupac.org/who-we-are/divisions/division-details/inchi/
k(298K):	rate coefficient at 298 K in cm3 molecule-1 s-1
A:	cm3 molecule-1 s-1
E/R:	K
Lower T	Lower bound of valid temperature range (K)
Upper T	Upper bound of valid temperature range (K)
Category:	E = evaluation; P = published; G = grey literature
Source	Source reference
Comment:	Any further information influencing the preferred value
Calculated k(298K):	rate coefficient calculated by SAR at 298 K in cm3 molecule-1 s-1
Pressure dependent rate coefficients for OH + organic compounds
Notation of temperature and pressure dependent third order rate coefficients follow the conventions as outlined in the IUPAC Guide to Data Sheets (section 1.3)
http://iupac.pole-ether.fr/htdocs/supp_info/Guide_2001.pdf
The third order rate coefficient is obtained from the following Lindemann-Hinshelwood equation which includes a broadening factor F:
where:
where:	log = log10
	N = [0.75 – 1.27 logFc]
Additional notes on data table columns
k0:	cm3 molecule-1 s-1
[M]	gas density in molecule cm-3
k¥:	cm3 molecule-1 s-1
Fc:	unitless
k(298K, 1 bar):	rate coefficient at 298 K and 1 bar in cm3 molecule-1 s-1

## Sheet: References
References
Aschmann and Atkinson (2008)	Aschmann, S. M. and Atkinson, R.: Rate constants for the gas-phase reactions of OH radicals with E-7-tetradecene, 2-methyl-1-tridecene and the C7–C14 1-alkenes at 295 ± K. Phys. Chem. Chem. Phys., 10, 4159–4164, 2008.
Aschmann et al. (2010)	Aschmann, S. M., Arey, J. and Atkinson, R.: Kinetics and products of the reactions of OH radicals with 4,4-dimethyl-1-pentene and 3,3-dimethylbutanal at 296 ± 2 K, J. Phys. Chem. A, 114, 5810–5816, 2010.
Atkinson et al. (1983)	Atkinson, R., Aschmann,S. M., Winer, A. M. , and Pitts, J. N., Jr.: Effects of ring strain on gas-phase rate constants. 2. OH radical reactions with cycloalkenes, Int. J. Chem. Kinet., 1984, 16, 697.
Atkinson and Arey (2003)	Atkinson, R. and Arey, J.: Atmospheric degradation of volatile organic compounds, Chem. Rev., 103, 4605-4638, 2003.
Braure et al. (2014)	Braure, T., Bedjanian, Y., Romanias, M. N., Morin, J., Riffault, V., Tomas, A., and Coddeville, P.: Experimental study of the reactions of limonene with OH and OD radicals: kinetics and products, J. Phys. Chem. A, 118, 9482−9490, 2014.
Gill and Hites (2002)	Gill, K. J. and Hites, R. A.: Rate constants for the gas-phase reactions of the hydroxyl radical with isoprene, α- and β-pinene, and limonene as a function of temperature. J. Phys. Chem. A, 106, 2538−2544, 2002.
IUPAC (Date)	Preferred value of the IUPAC Task Group on Atmospheric Chemical Kinetic Data Evaluation, http://iupac.pole-ether.fr/, in September 2017 ("Date" indicates date of evaluation of specific reaction)
Jenkin et al. (2005)	Jenkin, M. E., Sulbaek Andersen, M. P., Hurley, M. D., Wallington, T. J., Taketani, F., Matsumi, Y.: A kinetics and mechanistic study of the OH and NO2 initiated oxidation of cyclohexa-1,3-diene in the gas phase, Phys. Chem. Chem. Phys., 7, 1194-1204, 2005.
Nishino et al. (2009)	Nishino, N., Arey, J. and Atkinson, R.: Rate constants for the gas-phase reactions of OH radicals with a series of C6 - C14 alkenes at 299 ± 2 K, J. Phys. Chem. A, 113, 852–857, 2009.
Peeters et al. (1999)	Peeters, J., Vandenberk, S., Piessens, E. and Pultau, V.: H-atom abstraction in reactions of cyclic polyalkenes with OH, Chemosphere, 38, 1189-1195, 1999.

## Sheet: acyclic monoalkenes
Systematic name	Aternative name	Carbon number	SMILES	InChI	Reagent	k(298K)	A	E/R	Lower T	Upper T		Category	Source	Comment	Calculated k(298K)
acyclic linear alk-1-enes
ethene	ethylene	2	C=C	1S/C2H4/c1-2/h1-2H2	OH	9.05E-12a	4.58E-12a	-206a	200	300		E	IUPAC (December 2005)	a Based on recommended expression for high pressure limit: k = 9.00E-12*(T/300)-0.85. See below for full set of parameters.	8.4e-12
propene	propylene	3	C=CC	1S/C3H6/c1-3-2/h3H,1H2,2H3	OH	3.02E-11a	1.36E-11a	-242a	200	300		E	IUPAC (December 2005)	a Based on recommended expression for high pressure limit: k = 3.00E-11*(T/300)-1.0. See below for full set of parameters.	3.19123e-11
but-1-ene		4	C=CCC	1S/C4H8/c1-3-4-2/h3H,1,4H2,2H3	OH	3.1e-11	6.6e-12	-465	290	430		E	IUPAC (March 2009)		3.44516e-11
pent-1-ene		5	C=CCCC	1S/C5H10/c1-3-5-4-2/h3H,1,4-5H2,2H3	OH	3.14e-11						E	Atkinson and Arey (2003)		3.67026e-11
hex-1-ene		6	C=CCCCC	1S/C6H12/c1-3-5-6-4-2/h3H,1,4-6H2,2H3	OH	3.7e-11						E	Atkinson and Arey (2003)		3.84846e-11
hept-1-ene		7	C=CCCCCC	1S/C7H14/c1-3-5-7-6-4-2/h3H,1,4-7H2,2H3	OH	3.95e-11						P	Aschmann and Atkinson (2008)		4.01542e-11
oct-1-ene		8	C=CCCCCCC	1S/C8H16/c1-3-5-7-8-6-4-2/h3H,1,4-8H2,2H3	OH	4.14e-11						P	Aschmann and Atkinson (2008)		4.17446e-11
non-1-ene		9	C=CCCCCCCC	1S/C9H18/c1-3-5-7-9-8-6-4-2/h3H,1,4-9H2,2H3	OH	4.32e-11						P	Aschmann and Atkinson (2008)		4.32793e-11
dec-1-ene		10	C=CCCCCCCCC	1S/C10H20/c1-3-5-7-9-10-8-6-4-2/h3H,1,4-10H2,2H3	OH	4.61e-11						P	Aschmann and Atkinson (2008)		4.47746e-11
undec-1-ene		11	C=CCCCCCCCCC	1S/C11H22/c1-3-5-7-9-11-10-8-6-4-2/h3H,1,4-11H2,2H3	OH	4.79e-11						P	Aschmann and Atkinson (2008)		4.62423e-11
dodec-1-ene		12	C=CCCCCCCCCCC	1S/C12H24/c1-3-5-7-9-11-12-10-8-6-4-2/h3H,1,4-12H2,2H3	OH	5.03e-11						P	Aschmann and Atkinson (2008)		4.76904e-11
tridec-1-ene		13	C=CCCCCCCCCCCC	1S/C13H26/c1-3-5-7-9-11-13-12-10-8-6-4-2/h3H,1,4-13H2,2H3	OH	5.09e-11						P	Aschmann and Atkinson (2008)		4.91247e-11
tetradec-1-ene		14	C=CCCCCCCCCCCCC	1S/C14H28/c1-3-5-7-9-11-13-14-12-10-8-6-4-2/h3H,1,4-14H2,2H3	OH	4.96e-11						P	Aschmann and Atkinson (2008)		5.05493e-11
acyclic linear alk-2-enes
cis-but-2-ene		4	C/C=C\C	1S/C4H8/c1-3-4-2/h3-4H,1-2H3/b4-3-	OH	5.6e-11	1.1e-11	-485	290	430		E	IUPAC (March 2009)		5.4212e-11
trans-but-2-ene		4	C/C=C/C	1S/C4H8/c1-3-4-2/h3-4H,1-2H3/b4-3+	OH	6.4e-11	1e-11	-553	290	430		E	IUPAC (March 2009)		5.4212e-11
cis-pent-2-ene		5	C/C=C\CC	1S/C5H10/c1-3-5-4-2/h3,5H,4H2,1-2H3/b5-3-	OH	6.5e-11						E	Atkinson and Arey (2003)		5.94366e-11
trans-pent-2-ene		5	C/C=C/CC	1S/C5H10/c1-3-5-4-2/h3,5H,4H2,1-2H3/b5-3+	OH	6.7e-11						E	Atkinson and Arey (2003)		5.94366e-11
trans-hex-2-ene		6	C/C=C/CCC	1S/C6H12/c1-3-5-6-4-2/h3,5H,4,6H2,1-2H3/b5-3+	OH	6.08e-11						P	Nishino et al. (2009)		6.29098e-11
trans-hept-2-ene		7	C/C=C/CCCC	1S/C7H14/c1-3-5-7-6-4-2/h3,5H,4,6-7H2,1-2H3/b5-3+	OH	6.8e-11						P	Nishino et al. (2009)		6.48512e-11
trans-oct-2-ene		8	C/C=C/CCCCC	1S/C8H16/c1-3-5-7-8-6-4-2/h3,5H,4,6-8H2,1-2H3/b5-3+	OH	7.23e-11						P	Nishino et al. (2009)		6.66332e-11
trans-non-2-ene		9	C/C=C/CCCCCC	1S/C9H18/c1-3-5-7-9-8-6-4-2/h3,5H,4,6-9H2,1-2H3/b5-3+	OH	7.54e-11						P	Nishino et al. (2009)		6.83029e-11
trans-dec-2-ene		10	C/C=C/CCCCCCC	1S/C10H20/c1-3-5-7-9-10-8-6-4-2/h3,5H,4,6-10H2,1-2H3/b5-3+	OH	7.8e-11						P	Nishino et al. (2009)		6.98933e-11
other acyclic linear alkenes
trans-oct-4-ene		8	CCC/C=C/CCC	1S/C8H16/c1-3-5-7-8-6-4-2/h7-8H,3-6H2,1-2H3/b8-7+	OH	6.9e-11						E	Atkinson and Arey (2003)		7.26874e-11
cis-tetradec-7-ene		14	CCCCCC/C=C\CCCCCC	1S/C14H28/c1-3-5-7-9-11-13-14-12-10-8-6-4-2/h13-14H,3-12H2,1-2H3/b14-13-	OH	7.47e-11						P	Aschmann and Atkinson (2008)		8.27716e-11
acyclic branched alkenes
2-methylpropene		4	C=C(C)C	1S/C4H8/c1-4(2)3/h1H2,2-3H3	OH	5.1e-11	9.4e-12	-505	290	430		E	IUPAC (March 2009)		5.635e-11
2-methyl-but-1-ene		5	C=C(C)CC	1S/C5H10/c1-4-5(2)3/h2,4H2,1,3H3	OH	6.1e-11						E	Atkinson and Arey (2003)		6.02522e-11
3-methyl-but-1-ene		5	C=CC(C)C	1S/C5H10/c1-4-5(2)3/h4-5H,1H2,2-3H3	OH	3.18e-11	5.32e-12	-533	295	423		E	Atkinson and Arey (2003)		3.4576e-11
2-methyl-but-2-ene		5	CC(C)=CC	1S/C5H10/c1-4-5(2)3/h4H,1-3H3	OH	8.69e-11	1.92e-11	-450	295	426		E	Atkinson and Arey (2003)		8.0218e-11
2-methyl-pent-1-ene		6	C=C(C)CCC	1S/C6H12/c1-4-5-6(2)3/h2,4-5H2,1,3H3	OH	5.97e-11						P	Nishino et al. (2009)		6.34636e-11
3,3-dimethyl-but-1-ene		6	C=CC(C)(C)C	1S/C6H12/c1-5-6(2,3)4/h5H,1H2,2-4H3	OH	2.8e-11						E	Atkinson and Arey (2003)		3.10265e-11
2-methyl-pent-2-ene		6	CC(C)=CCC	1S/C6H12/c1-4-5-6(2)3/h5H,4H2,1-3H3	OH	8.9e-11						E	Atkinson and Arey (2003)		8.54426e-11
trans-4-methyl-pent-2-ene		6	C/C=C/C(C)C	1S/C6H12/c1-4-5-6(2)3/h4-6H,1-3H3/b5-4+	OH	6.1e-11						E	Atkinson and Arey (2003)		6.2995e-11
2,3-dimethyl-but-2-ene		6	CC(C)=C(C)C	1S/C6H12/c1-5(2)6(3)4/h1-4H3	OH	1.1e-10						E	Atkinson and Arey (2003)		1.06224e-10
2-methyl-hex-1-ene		7	C=C(C)CCCC	1S/C7H14/c1-4-5-6-7(2)3/h2,4-6H2,1,3H3	OH	6.5e-11						P	Nishino et al. (2009)		6.59225e-11
4,4-dimethyl-pent-1-ene		7	C=CCC(C)(C)C	1S/C7H14/c1-5-6-7(2,3)4/h5H,1,6H2,2-4H3	OH	2.41e-11						E	Aschmann et al. (2010)		3.36219e-11
2,3-dimethyl-pent-2-ene		7	CC(C)=C(C)CC	1S/C7H14/c1-5-7(4)6(2)3/h5H2,1-4H3	OH	1.03e-10						E	Atkinson and Arey (2003)		1.1249e-10
trans-4,4-dimethyl-pent-2-ene		7	C/C=C/C(C)(C)C	1S/C7H14/c1-5-6-7(2,3)4/h5-6H,1-4H3/b6-5+	OH	5.5e-11						E	Atkinson and Arey (2003)		5.39325e-11
2-methyl-hept-1-ene		8	C=C(C)CCCCC	1S/C8H16/c1-4-5-6-7-8(2)3/h2,4-7H2,1,3H3	OH	6.71e-11						P	Nishino et al. (2009)		6.80691e-11
2-methyl-oct-1-ene		9	C=C(C)CCCCCC	1S/C9H18/c1-4-5-6-7-8-9(2)3/h2,4-8H2,1,3H3	OH	7.02e-11						P	Nishino et al. (2009)		6.99956e-11
2-methyl-non-1-ene		10	C=C(C)CCCCCCC	1S/C10H20/c1-4-5-6-7-8-9-10(2)3/h2,4-9H2,1,3H3	OH	7.28e-11						P	Nishino et al. (2009)		7.17671e-11
2-methyl-dec-1-ene		11	C=C(C)CCCCCCCC	1S/C11H22/c1-4-5-6-7-8-9-10-11(2)3/h2,4-10H2,1,3H3	OH	7.85e-11						P	Nishino et al. (2009)		7.34294e-11
2-methyl-undec-1-ene		12	C=C(C)CCCCCCCCC	1S/C12H24/c1-4-5-6-7-8-9-10-11-12(2)3/h2,4-11H2,1,3H3	OH	7.85e-11						P	Nishino et al. (2009)		7.50146e-11
2-methyl-dodec-1-ene		13	C=C(C)CCCCCCCCCC	1S/C13H26/c1-4-5-6-7-8-9-10-11-12-13(2)3/h2,4-12H2,1,3H3	OH	7.96e-11						P	Nishino et al. (2009)		7.65456e-11
2-methyl-tridec-1-ene		14	C=C(C)CCCCCCCCCCC	1S/C14H28/c1-4-5-6-7-8-9-10-11-12-13-14(2)3/h2,4-13H2,1,3H3	OH	8.38e-11						P	Nishino et al. (2009)		7.80383e-11
		number of entries
		44
Pressure-dependent expressions
Systematic name	Aternative name	Carbon number	SMILES	InChI	Reagent	k (298 K, 1 bar)	k0	k¥	Fc	Lower T	Upper T	Category	Source	Comment
ethene	ethylene	2	C=C	1S/C2H4/c1-2/h1-2H2	OH	7.9e-12	8.60E-29 (T/300)-3.1 [M]	9.00E-12 (T/300)-0.85	0.48	200	300	E	IUPAC (December 2005)
propene	propylene	3	C=CC	1S/C3H6/c1-3-2/h3H,1H2,2H3	OH	2.9e-11	8.00E-27 (T/300)-3.5 [M]	3.00E-11 (T/300)-1.0	0.5	200	300	E	IUPAC (December 2005)

## Sheet: acyclic dialkenes
Systematic name	Aternative name	Carbon number	SMILES	InChI	Reagent	k(298K)	A	E/R	Lower T	Upper T	Category	Source	Comment	Calculated k(298K)
acyclic dialkenes (cumulative)
propadiene		3	C=C=C	1S/C3H4/c1-3-2/h1-2H2	OH	9.82e-12	7.66e-12	-74	295	478	E	Atkinson and Arey (2003)		1e-11
buta-1,2-diene		4	C=C=CC	1S/C4H6/c1-3-4-2/h4H,1H2,2H3	OH	2.6e-11					E	Atkinson and Arey (2003)		2.913e-11
penta-1,2-diene		5	C=C=CCC	1S/C5H8/c1-3-5-4-2/h5H,1,4H2,2H3	OH	3.55e-11					E	Atkinson and Arey (2003)		3.10608e-11
3-methyl-buta-1,2-diene		5	C=C=C(C)C	1S/C5H8/c1-4-5(2)3/h1H2,2-3H3	OH	5.7e-11					E	Atkinson and Arey (2003)		5.70745e-11
acyclic dialkenes (isolated)
penta-1,4-diene		5	C=CCC=C	1S/C5H8/c1-3-5-4-2/h3-4H,1-2,5H2	OH	5.3e-11					E	Atkinson and Arey (2003)		6.4845e-11
trans-hexa-1,4-diene		6	C=CC/C=C/C	1S/C6H10/c1-3-5-6-4-2/h3-4,6H,1,5H2,2H3/b6-4+	OH	9.1e-11					E	Atkinson and Arey (2003)		9.05963e-11
hexa-1,5-diene		6	C=CCCC=C	1S/C6H10/c1-3-5-6-4-2/h3-4H,1-2,5-6H2	OH	6.2e-11					E	Atkinson and Arey (2003)		6.61907e-11
2-methyl-penta-1,4-diene		6	C=C(C)CC=C	1S/C6H10/c1-4-5-6(2)3/h4H,1-2,5H2,3H3	OH	7.9e-11					E	Atkinson and Arey (2003)		9.0045e-11
2-methyl-hexa-1,5-diene		7	C=C(C)CCC=C	1S/C7H12/c1-4-5-6-7(2)3/h4H,1-2,5-6H2,3H3	OH	9.6e-11					E	Atkinson and Arey (2003)		9.17157e-11
2,5-dimethyl-hexa-1,5-diene		8	C=C(C)CCC(C)=C	1S/C8H14/c1-7(2)5-6-8(3)4/h1,3,5-6H2,2,4H3	OH	1.2e-10					E	Atkinson and Arey (2003)		1.17241e-10
acyclic dialkenes (conjugated)
buta-1,3-diene		4	C=CC=C	1S/C4H6/c1-3-4-2/h3-4H,1-2H2	OH	6.66e-11	1.48e-11	-448	295	483	E	Atkinson and Arey (2003)		6.84e-11
cis-penta-1,3-diene		5	C=C/C=C\C	1S/C5H8/c1-3-5-4-2/h3-5H,1H2,2H3/b5-4-	OH	1.01e-10					E	Atkinson and Arey (2003)		1.01631e-10
2-methyl-buta-1,3-diene	isoprene	5	C=C(C)C=C	1S/C5H8/c1-4-5(2)3/h4H,1-2H2,3H3	OH	1e-10	2.7e-11	-390	240	430	E	IUPAC (June 2013)		9.9725e-11
trans-hexa-1,3-diene		6	C=C/C=C/CC	1S/C6H10/c1-3-5-6-4-2/h3,5-6H,1,4H2,2H3/b6-5+	OH	1.12e-10					E	Atkinson and Arey (2003)		1.0902e-10
hexa-2,4-diene (cis- and trans- combinations)		6	CC=CC=CC	1S/C6H10/c1-3-5-6-4-2/h3-6H,1-2H3	OH	1.34e-10					E	Atkinson and Arey (2003)		1.35824e-10
2-methyl-penta-1,3-diene		6	C=C(C)C=CC	1S/C6H10/c1-4-5-6(2)3/h4-5H,2H2,1,3H3	OH	1.36e-10					E	Atkinson and Arey (2003)		1.35956e-10
4-methyl-penta-1,3-diene		6	C=CC=C(C)C	1S/C6H10/c1-4-5-6(2)3/h4-5H,1H2,2-3H3	OH	1.31e-10					E	Atkinson and Arey (2003)		1.34962e-10
2,3-dimethyl-buta-1,3-diene		6	C=C(C)C(C)=C	1S/C6H10/c1-5(2)6(3)4/h1,3H2,2,4H3	OH	1.22e-10					E	Atkinson and Arey (2003)		1.3105e-10
2,5-dimethyl-hexa-2,4-diene		8	CC(C)=CC=C(C)C	1S/C8H14/c1-7(2)5-6-8(3)4/h5-6H,1-4H3	OH	2.1e-10					E	Atkinson and Arey (2003)		2.03448e-10
7-methyl-3-methylene-octa-1,6-diene	b-myrcene	10	CC(=CCCC(=C)C=C)C	1S/C10H16/c1-5-10(4)8-6-7-9(2)3/h5,7H,1,4,6,8H2,2-3H3	OH	2.15e-10					E	Atkinson and Arey (2003)	Compound also has an isolated double bond	1.87844e-10
3,7-dimethyl-1,3,6-octatriene	b-ocimene (cis- and trans-)	10	C=CC(C)=CCC=C(C)C	1S/C10H16/c1-5-10(4)8-6-7-9(2)3/h5,7-8H,1,6H2,2-4H3	OH	2.52e-10					E	Atkinson and Arey (2003)	Compound also has an isolated double bond	2.52392e-10
		number of entries
		21

## Sheet: cycloalkenes
Systematic name	Aternative name	Carbon number	SMILES	InChI	Reagent	k(298K)	A	E/R	Lower T	Upper T	Category	Source	Comment	Calculated k(298K)
cyclopentene		5	C1CCC=C1	1S/C5H8/c1-2-4-5-3-1/h1-2H,3-5H2	OH	6.7e-11					E	Atkinson and Arey (2003)		6.24494e-11
cyclohexene		6	C1CCCC=C1	1S/C6H10/c1-2-4-6-5-3-1/h1-2H,3-6H2	OH	6.77e-11					E	Atkinson and Arey (2003)		6.74923e-11
cyclohexa-1,3-diene		6	C1=CCCC=C1	1S/C6H8/c1-2-4-6-5-3-1/h1-4H,5-6H2	OH	1.6e-10					E	Atkinson et al. (1983), Peeters et al. (1999), Jenkin et al. (2005)	Based on average of the determinations.	1.57059e-10
cyclohexa-1,4-diene		6	C1=CCC=CC1	1S/C6H8/c1-2-4-6-5-3-1/h1-2,5-6H,3-4H2	OH	9.95e-11					E	Atkinson and Arey (2003)		1.23318e-10
cycloheptene		7	C1CCCCC=C1	1S/C7H12/c1-2-4-6-7-5-3-1/h1-2H,3-7H2	OH	7.4e-11					E	Atkinson and Arey (2003)		7.17269e-11
cyclohepta-1,3-diene		7	C1=CC=CCCC1	1S/C7H10/c1-2-4-6-7-5-3-1/h1-4H,5-7H2	OH	1.39e-10					E	Atkinson and Arey (2003)		1.63005e-10
1-methyl-cyclohexene		7	CC1=CCCCC1	1S/C7H12/c1-7-5-3-2-4-6-7/h5H,2-4,6H2,1H3	OH	9.4e-11					E	Atkinson and Arey (2003)		9.34983e-11
bicyclo[2.2.1]-2-heptene		7	C1(C2)C=CC2CC1	1S/C7H10/c1-2-7-4-3-6(1)5-7/h1-2,6-7H,3-5H2	OH	4.9e-11					E	Atkinson and Arey (2003)		5.84208e-11
bicyclo[2.2.1]-2,5-heptadiene		7	C1(C2)C=CC2C=C1	1S/C7H8/c1-2-7-4-3-6(1)5-7/h1-4,6-7H,5H2	OH	1.2e-10					E	Atkinson and Arey (2003)		1.09183e-10
bicyclo[2.2.2]-2-octene		8	C1(CC2)C=CC2CC1	1S/C8H12/c1-2-8-5-3-7(1)4-6-8/h1-2,7-8H,3-6H2	OH	4.1e-11					E	Atkinson and Arey (2003)		6.39456e-11
2,2-dimethyl-3-methylene-bicyclo[2.2.1]heptane	camphene	10	C1(=C)C(C)(C)C2CC1CC2	1S/C10H16/c1-7-8-4-5-9(6-8)10(7,2)3/h8-9H,1,4-6H2,2-3H3	OH	5.3e-11					E	Atkinson and Arey (2003)		6.18718e-11
3,7,7-trimethyl-bicyclo[4.1.0]hept-2-ene	2-carene	10	CC2(C1CCC(C)=CC12)C	1S/C10H16/c1-7-4-5-8-9(6-7)10(8,2)3/h6,8-9H,4-5H2,1-3H3	OH	8e-11					E	Atkinson and Arey (2003)		8.65285e-11
3,7,7-trimethyl-bicyclo[4.1.0]hept-3-ene	3-carene	10	CC(C1CC=C(CC12)C)2C	1S/C10H16/c1-7-4-5-8-9(6-7)10(8,2)3/h4,8-9H,5-6H2,1-3H3	OH	8.8e-11					E	Atkinson and Arey (2003)		9.13118e-11
4-isopropenyl-1-methyl-cyclohexene	limonene	10	CC1=CCC(CC1)C(C)=C	1S/C10H16/c1-8(2)10-6-4-9(3)5-7-10/h4,10H,1,5-7H2,2-3H3	OH	1.65e-10	3.55e-11	-458	220	360	E	Gill and Hites (2002), Braure et al. (2014)	Based on average of the determinations.	1.54641e-10
2,6,6-trimethyl-bicyclo[3.1.1]hept-2-ene	a-pinene	10	CC1(C)C2CC=C(C)C1C2	1S/C10H16/c1-7-4-5-8-6-9(7)10(8,2)3/h4,8-9H,5-6H2,1-3H3	OH	5.3e-11	1.2e-11	-440	290	430	E	IUPAC (December 2007)		8.80248e-11
6,6-dimethyl-2-methylene-bicyclo[3.1.1]heptane	b-pinene	10	C=C1C2CC(C(C)2C)CC1	1S/C10H16/c1-7-4-5-8-6-9(7)10(8,2)3/h8-9H,1,4-6H2,2-3H3	OH	7.43e-11	1.55e-11	-467	294	364	E	Atkinson and Arey (2003)		6.29171e-11
2-methyl-5-(1-methylethyl)-1,3-cyclohexadiene	a-phellandrene	10	CC(C1C=CC(C)=CC1)C	1S/C10H16/c1-8(2)10-6-4-9(3)5-7-10/h4-6,8,10H,7H2,1-3H3	OH	3.2e-10					E	IUPAC (June 2014)		2.22987e-10
3-methylene-6-(1-methylethyl)cyclohexene	b-phellandrene	10	CC(C(C=C1)CCC1=C)C	1S/C10H16/c1-8(2)10-6-4-9(3)5-7-10/h4,6,8,10H,3,5,7H2,1-2H3	OH	1.7e-10					E	IUPAC (June 2014)		1.72103e-10
1-isopropyl-4-methylene-bicyclo[3.1.0]hexane	sabinene	10	C=C2C1CC(CC2)1C(C)C	1S/C10H16/c1-7(2)10-5-4-8(3)9(10)6-10/h7,9H,3-6H2,1-2H3	OH	1.17e-10					E	Atkinson and Arey (2003)		6.08911e-11
1-isopropyl-4-methyl-cyclohexa-1,3-diene	a-terpinene	10	CC1=CC=C(CC1)C(C)C	1S/C10H16/c1-8(2)10-6-4-9(3)5-7-10/h4,6,8H,5,7H2,1-3H3	OH	3.5e-10					E	IUPAC (June 2014)		2.42286e-10
1-isopropyl-4-methyl-cyclohexa-1,4-diene	g-terpinene	10	CC1=CCC(C(C)C)=CC1	1S/C10H16/c1-8(2)10-6-4-9(3)5-7-10/h4,7-8H,5-6H2,1-3H3	OH	1.7e-10					E	IUPAC (June 2014)		1.84113e-10
4-isopropylidene-1-methyl-cyclohexene	terpinolene	10	CC(CC1)=CCC1=C(C)C	1S/C10H16/c1-8(2)10-6-4-9(3)5-7-10/h4H,5-7H2,1-3H3	OH	2.2e-10					E	IUPAC (June 2014)		2.04506e-10
2,6,6,8-tetramethyl-tricyclo[5.3.1.01,5]undec-8-ene	a-cedrene	15	CC2=CCC13C(C)CCC1C(C)(C)C2C3	1S/C15H24/c1-10-7-8-15-9-12(10)14(3,4)13(15)6-5-11(15)2/h7,11-13H,5-6,8-9H2,1-4H3	OH	6.7e-11					E	IUPAC (June 2014)		9.34799e-11
8-isopropyl-1,3-dimethyl-tricyclo[4.4.0.02,7]dec-3-ene	a-copaene	15	CC1=CCC2C3C1C(C)2CCC3C(C)C	1S/C15H24/c1-9(2)11-7-8-15(4)12-6-5-10(3)14(15)13(11)12/h5,9,11-14H,6-8H2,1-4H3	OH	9e-11					E	Atkinson and Arey (2003)		9.66572e-11
4,11,11-trimethyl-8-methylene-bicyclo[7.2.0]undec-4-ene	b-caryophyllene	15	C/C1=C/CCC(=C)C2CC(C)(C)C2CC\1	1S/C15H24/c1-11-6-5-7-12(2)13-10-15(3,4)14(13)9-8-11/h6,13-14H,2,5,7-10H2,1,3-4H3/b11-6-	OH	2e-10					E	IUPAC (June 2014)		1.55108e-10
2,6,6,9-tetramethyl-1,4-8-cycloundecatriene	a-humulene	15	C1=CC(C)(C)CC=C(CCC=C(C1)C)C	1S/C15H24/c1-13-7-5-8-14(2)10-12-15(3,4)11-6-9-13/h6-7,10-11H,5,8-9,12H2,1-4H3/b11-6+,13-7+,14-10-	OH	2.9e-10					E	IUPAC (June 2014)		2.39008e-10
3,3,7-trimethyl-8-methylenetricyclo[5.4.0.02,9]undecane	longifolene	15	C=C2C1(C)CCCC(C)(C)C3C1CCC23	1S/C15H24/c1-10-11-6-7-12-13(11)14(2,3)8-5-9-15(10,12)4/h11-13H,1,5-9H2,2-4H3	OH	4.7e-11					E	IUPAC (June 2014)		6.95081e-11
		number of entries
		27
