# Supplementary material for: Estimation of rate coefficients and branching ratios for gas-phase reactions of OH with aliphatic organic compounds for use in automated mechanism construction
Source: Copernicus journal article supplement (doi:10.5194/acp-18-9297-2018), 2018-07-04
Supplement: Supplementary file 2 [file acp-18-9297-2018-supplement.zip › SI_4_OH_unsaturated oxygenate_preferred data.xls]

## Sheet: Notes
Pressure independent rate coefficients for OH + organic compounds
Rate coefficients in the form: k = A.exp(-E/RT) (i)
Notes on data table columns
Systematic name	systematic name of organic compound, usually based on IUPAC nomenclature
Alternative name	alternative/common names for organic compound
Carbon number	the number of carbon atoms in the organic compound
SMILES:	SMILES notation for organic compound				http://www.daylight.com/smiles/index.html
InChI:	InChI notation for organic compound				http://iupac.org/who-we-are/divisions/division-details/inchi/
k(298K):	rate coefficient at 298 K in cm3 molecule-1 s-1
A:	cm3 molecule-1 s-1
E/R:	K
Lower T	Lower bound of valid temperature range (K)
Upper T	Upper bound of valid temperature range (K)
Category:	E = evaluation; P = published; G = grey literature
Source	Source reference
Comment:	Any further information influencing the preferred value
Calculated k(298K):	rate coefficient calculated by SAR at 298 K in cm3 molecule-1 s-1

## Sheet: References
References
Atkinson and Aschmann (1993)	Atkinson, R. and Aschmenn, S. M.: Atmospheric chemistry of the monoterpene reaction products nopinone, camphenilone, and 4-acetyl- 1-methylcyclohexene, J. Atmos. Chem., 16, 337-348, 1993.
Blanco et al. (2012)	Blanco, M. B., Barnes I and Wiesen, P: Kinetic investigation of the OH radical and Cl atom initiated degradation of unsaturated ketones at atmospheric pressure and 298 K, J. Phys. Chem. A, 116, 6033-6040, 2012.
Calvert et al. (2011)	Calvert, J. G., Mellouki, A., Orlando, J. J., Pilling, M. J. and Wallington, T. J.: The mechanisms of atmospheric oxidation of the oxygenates, Oxford University Press, Oxford. ISBN 978-0-19976707-6, 2011.
Gibilisco et al. (2013)	Gibilisco, R. G., Santiago, A. N. and Teruel, M. A.: OH-initiated degradation of a series of hexenols in the troposphere. Rate coefficients at 298 K and 1 atm, Atmos. Environ., 77, 358-364, 2013.
IUPAC (Date)	Preferred value of the IUPAC Task Group on Atmospheric Chemical Kinetic Data Evaluation, http://iupac.pole-ether.fr/, in September 2017 ("Date" indicates date of evaluation of specific reaction)
Jacobs et al. (2014)	Jacobs, M. I., Burke, W. J., and Elrod, M. J.: Kinetics of the reactions of isoprene-derived hydroxynitrates: gas phase epoxide formation and solution phase hydrolysis, Atmos. Chem. Phys., 14, 8933-8946, 2014.
Klotz et al. (1999)	Klotz, B., Barnes, I. and Becker, K. H.: Kinetic study of the gas-phase photolysis and OH radical reaction of E,Z- and E,E-2,4-hexadiendial, Int. J. Chem. Kinet., 31, 689-697, 1999.
Lee et al. (2014)	Lee, L., Teng, A. P., Wennberg, P. O., Crounse, J. D. Cohen, R. C.: On rates and mechanisms of OH and O3 reactions with isoprene-derived hydroxy nitrates, J. Phys. Chem. A, 118 (9), 1622-1637, 2014.
Nielsen et al. (1990)	Nielsen, O. J., Donlon, M., Sidebottom, H. W., O'Farrell, D. J. and Treacy, J.: Rate constants for the gas-phase reactions of OH radicals with nitroethene, 3-nitropropene and 1-nitrocyclohexene, Chem. Phys. Lett., 168, 319-323, 1990.
Paulot et al. (2009)	Paulot, F., Crounse, J. D., Kjaergaard, H. G., Kroll, J. H., Seinfeld, J. H., and Wennberg, P. O.: Isoprene photooxidation: new insights into the production of acids and organic nitrates, Atmos. Chem. Phys., 9, 1479-1501, 2009.
St. Clair et al. (2015)	St. Clair, J. M., Rivera-Rios, J. C., Crounse, J. D., Knap, H. C., Bates, K. H., Teng, A. P., Jørgensen, S., Kjaergaard, H. G., Keutsch, F. N. and Wennberg, P. O.: Kinetics and products of the reaction of the first-generation isoprene hydroxy hydroperoxide (ISOPOOH) with OH, J. Phys. Chem. A, 120 (9), 1441-1451, 2016.
Tuazon et al. (2005)	Tuazon, E. C., Aschmann, S. M., Nishino, N., Arey, J. and Atkinson, R.: Kinetics and products of the OH radical-initiated reaction of 3-methyl-2-butenal, Phys . Chem. Chem. Phys .,7, 2298-2304, 2005.
Xiong et al. (2016)	Xiong, F., Borca, C. H., Slipchenko, L. V., and Shepson, P. B.: Photochemical degradation of isoprene-derived 4,1-nitrooxy enal, Atmos. Chem. Phys., 16, 5595-5610, 2016.

## Sheet: alcohols
Systematic name	Aternative name	Carbon number	SMILES	InChI	Reagent	k(298K)	A	E/R	Lower T	Upper T	Category	Source	Comment	Calculated k(298K)
a,b-unsaturated alcohols (allylic alcohols)
2-propen-1-ol	allyl alcohol	3	C=CCO	1S/C3H6O/c1-2-3-4/h2,4H,1,3H2	OH	5e-11	5.7e-12	-650	231	373	E	Calvert et al. (2011)		5.8601e-11
2-buten-1-ol	crotyl alcohol	4	CC=CCO	1S/C4H8O/c1-2-3-4-5/h2-3,5H,4H2,1H3	OH	8.7e-11	7.4e-12	-734	263	370	E	Calvert et al. (2011)		9.31203e-11
3-buten-2-ol		4	CC(O)C=C	1S/C4H8O/c1-3-4(2)5/h3-5H,1H2,2H3	OH	5.9e-11					E	Calvert et al. (2011)		6.5441e-11
2-methyl-2-propen-1-ol		4	C=C(C)CO	1S/C4H8O/c1-4(2)3-5/h5H,1,3H2,2H3	OH	9e-11	8.1e-12	-716	263	370	E	Calvert et al. (2011)		1.04286e-10
2-penten-1-ol (cis)		5	OC\C=C/CC	1S/C5H10O/c1-2-3-4-5-6/h3-4,6H,2,5H2,1H3/b4-3-	OH	1.17e-10					E	Calvert et al. (2011)		1.0508e-10
1-penten-3-ol		5	C=CC(O)CC	1S/C5H10O/c1-3-5(6)4-2/h3,5-6H,1,4H2,2H3	OH	7.4e-11					E	Calvert et al. (2011)		7.20353e-11
3-methyl-2-buten-1-ol		5	CC(C)=CCO	1S/C5H10O/c1-5(2)3-4-6/h3,6H,4H2,1-2H3	OH	1.6e-10					E	Calvert et al. (2011)		1.20496e-10
2-methyl-3-buten-2-ol	MBO	5	CC(O)(C)C=C	1S/C5H10O/c1-4-5(2,3)6/h4,6H,1H2,2-3H3	OH	6.3e-11	8.1e-12	-610	230	300	E	IUPAC (October 2007)		5.2382e-11
2-hexen-1-ol (trans)		6	CCC/C=C/CO	1S/C6H12O/c1-2-3-4-5-6-7/h4-5,7H,2-3,6H2,1H3/b5-4+	OH	9.62e-11					P	Gibilisco et al. (2013)	based on current preferred values for reference rate coefficients	1.11753e-10
3,7-dimethyl-octa-2,6-dien-1-ol	geraniol	10	CC(C)=CCCC(C)=CCO	1S/C10H18O/c1-9(2)5-4-6-10(3)7-8-11/h5,7,11H,4,6,8H2,1-3H3	OH	2.3e-10					E	Calvert et al. (2011)		2.21547e-10
3,7-dimethyl-6-octen-1-ol	citronellol	10	CC(C)=CCCC(C)CCO	1S/C10H20O/c1-9(2)5-4-6-10(3)7-8-11/h5,10-11H,4,6-8H2,1-3H3	OH	1.7e-10					E	Calvert et al. (2011)		9.66459e-11
b,g-unsaturated alcohols
3-buten-1-ol		4	C=CCCO	1S/C4H8O/c1-2-3-4-5/h2,5H,1,3-4H2	OH	5.5e-11	3.8e-12	-797	263	371	E	Calvert et al. (2011)		6.06081e-11
3-methyl-3-buten-1-ol		5	C=C(C)CCO	1S/C5H10O/c1-5(2)3-4-6/h6H,1,3-4H2,2H3	OH	9.4e-11	6.1e-12	-814	263	369	E	Calvert et al. (2011)		1.06293e-10
3-hexen-1-ol (cis)		6	OCC\C=C/CC	1S/C6H12O/c1-2-3-4-5-6-7/h3-4,7H,2,5-6H2,1H3/b4-3-	OH	1.07e-10					E	Calvert et al. (2011)		9.6421e-11
3-hexen-1-ol (trans)		6	OCC/C=C/CC	1S/C6H12O/c1-2-3-4-5-6-7/h3-4,7H,2,5-6H2,1H3/b4-3+	OH	1.08e-10					P	Gibilisco et al. (2013)	based on current preferred values for reference rate coefficients	9.6421e-11
other unsaturated alcohols
2,6-dimethyl-7-octen-2-ol	dihydromyrcenol	10	CC(O)(C)CCCC(C)C=C	1S/C10H20O/c1-5-9(2)7-6-8-10(3,4)11/h5,9,11H,1,6-8H2,2-4H3	OH	3.8e-11					E	Calvert et al. (2011)		4.21523e-11
3,7-dimethyl-1,6-octadien-3-ol	linalool	10	C=CC(O)(C)CCC=C(C)C	1S/C10H18O/c1-5-10(4,11)8-6-7-9(2)3/h5,7,11H,1,6,8H2,2-4H3	OH	1.9e-10					E	Calvert et al. (2011)		1.40683e-10
2-(4-methylcyclohex-3-en-1-yl)propan-2-ol	a-terpineol	10	CC(O)(C1CC=C(C)CC1)C	1S/C10H18O/c1-8-4-6-9(7-5-8)10(2,3)11/h4,9,11H,5-7H2,1-3H3	OH	1.9e-10					E	Calvert et al. (2011)		9.99742e-11
		number of entries
		18

## Sheet: aldehydes
Systematic name	Aternative name	Carbon number	SMILES	InChI	Reagent	k(298K)	A	E/R	Lower T	Upper T	Category	Source	Comment	Calculated k(298K)
a,b-unsaturated aldehydes
2-propenal	acrolein	3	C=CC=O	1S/C3H4O/c1-2-3-4/h2-3H,1H2	OH	2.16e-11	7.1e-12	-333	243	373	E	Calvert et al. (2011)		2.4038e-11
2-butenal	crotonaldehyde	4	CC=CC=O	1S/C4H6O/c1-2-3-4-5/h2-4H,1H3	OH	3.6e-11	6e-12	-533	243	373	E	Calvert et al. (2011)		4.6944e-11
2-methyl-2-propenal	methacrolein	4	C=C(C)C=O	1S/C4H6O/c1-4(2)3-5/h3H,1H2,2H3	OH	2.9e-11	8e-12	-380	230	380	E	IUPAC (October 2007)		3.0969e-11
2-pentenal (trans)		5	CC/C=C/C=O	1S/C5H8O/c1-2-3-4-5-6/h3-5H,2H2,1H3/b4-3+	OH	4.4e-11	7.9e-12	-510	244	374	E	Calvert et al. (2011)		5.21686e-11
3-methyl-2-butenal		5	CC(C)=CC=O	1S/C5H8O/c1-5(2)3-4-6/h3-4H,1-2H3	OH	6.21e-11					E	Tuazon et al. (2005)		7.295e-11
2-hexenal (trans)		6	CCC/C=C/C=O	1S/C6H10O/c1-2-3-4-5-6-7/h4-6H,2-3H2,1H3/b5-4+	OH	4.3e-11	7.5e-12	-520	244	374	E	Calvert et al. (2011)		5.56418e-11
2-heptenal (trans)		7	CCCC/C=C/C=O	1S/C7H12O/c1-2-3-4-5-6-7-8/h5-7H,2-4H2,1H3/b6-5+	OH	4.4e-11	9.7e-12	-450	244	374	E	Calvert et al. (2011)		5.75832e-11
other unsaturated aldehydes
4-methylenehex-5-enal		7	C=CC(CCC=O)=C	1S/C7H10O/c1-3-7(2)5-4-6-8/h3,6H,1-2,4-5H2	OH	1.55e-10					E	Calvert et al. (2011)		1.27775e-10
3(Z-)4-methylhex-3,5-dienal		7	C=C/C(C)=C\CC=O	1S/C7H10O/c1-3-7(2)5-4-6-8/h3,5-6H,1,4H2,2H3/b7-5-	OH	1.61e-10					E	Calvert et al. (2011)		1.59796e-10
3(E-)4-methylhex-3,5-dienal		7	C=C/C(C)=C/CC=O	1S/C7H10O/c1-3-7(2)5-4-6-8/h3,5-6H,1,4H2,2H3/b7-5+	OH	2.52e-10					E	Calvert et al. (2011)		1.59796e-10
3,7-dimethyl-6-octen-1-al	citronellal	10	CC(C)=CCCC(C)CC=O	1S/C10H18O/c1-9(2)5-4-6-10(3)7-8-11/h5,8,10H,4,6-7H2,1-3H3	OH	1.51e-10					E	Calvert et al. (2011)		1.16103e-10
unsaturated dialdehydes/ketoaldehydes
Z-butenedial		4	O=C/C=C\C=O	1S/C4H4O2/c5-3-1-2-4-6/h1-4H/b2-1-	OH	5.7e-11					E	Calvert et al. (2011)		3.9676e-11
4-oxo-2-pentenal		5	CC(C=CC=O)=O	1S/C5H6O2/c1-5(7)3-2-4-6/h2-4H,1H3	OH	6.1e-11					E	Calvert et al. (2011)		3.5748e-11
E-,E-2,4-hexadienedial		6	O=C/C=C/C=C/C=O	1S/C6H6O2/c7-5-3-1-2-4-6-8/h1-6H/b3-1+,4-2+	OH	7.6e-11					E	Calvert et al. (2011)	Based on Klotz et al. (1999)	8.04682e-11
E-,Z-2,4-hexadienedial		6	O=C/C=C\C=C\C=O	1S/C6H6O2/c7-5-3-1-2-4-6-8/h1-6H/b3-1-,4-2+	OH	7.4e-11					E	Calvert et al. (2011)	Based on Klotz et al. (1999)	8.04682e-11
E-,E-2-methyl-2,4-hexadienedial		7	O=C/C(C)=C/C=C/C=O	1S/C7H8O2/c1-7(6-9)4-2-3-5-8/h2-6H,1H3/b3-2+,7-4+	OH	1.18e-10					E	Calvert et al. (2011)		9.14336e-11
		number of entries
		16

## Sheet: ketones and hydroxyketones
Systematic name	Aternative name	Carbon number	SMILES	InChI	Reagent	k(298K)	A	E/R	Lower T	Upper T	Category	Source	Comment	Calculated k(298K)
acyclic ketones
but-3-en-2-one	methyl vinyl ketone	4	O=C(C)C=C	1S/C4H6O/c1-3-4(2)5/h3H,1H2,2H3	OH	2e-11	2.6e-12	-610	232	378	E	IUPAC (October 2007)		2.011e-11
pent-3-en-2-one		5	CC(C=CC)=O	1S/C5H8O/c1-3-4-5(2)6/h3-4H,1-2H3	OH	7.22e-11					P	Blanco et al. (2012)		4.3016e-11
hex-4-en-3-one		6	CCC(C=CC)=O	1S/C6H10O/c1-3-5-6(7)4-2/h3,5H,4H2,1-2H3	OH	9.04e-11					P	Blanco et al. (2012)		4.4097e-11
hex-5-en-3-one		6	CCC(CC=C)=O	1S/C6H10O/c1-3-5-6(7)4-2/h3H,1,4-5H2,2H3	OH	5.18e-11					P	Blanco et al. (2012)		3.36335e-11
6-methyl-hept-5-en-2-one		8	CC(CCC=C(C)C)=O	1S/C8H14O/c1-7(2)5-4-6-8(3)9/h5H,4,6H2,1-3H3	OH	1.57e-10					E	Calvert et al. (2011)		9.67907e-11
cyclic ketones
3-methyl-cyclohex-2-en-1-one		7	O=C1C=C(C)CCC1	1S/C7H10O/c1-6-3-2-4-7(8)5-6/h5H,2-4H2,1H3	OH	3.1e-11					E	Calvert et al. (2011)		7.85402e-11
4-methyl-cyclohex-3-en-1-one		7	O=C1CC=C(C)CC1	1S/C7H10O/c1-6-2-4-7(8)5-3-6/h2H,3-5H2,1H3	OH	1.1e-10					E	Calvert et al. (2011)		9.95216e-11
3,5,5-trimethyl-cyclohex-2-en-1-one		9	O=C1C=C(C)CC(C)(C)C1	1S/C9H14O/c1-7-4-8(10)6-9(2,3)5-7/h4H,5-6H2,1-3H3	OH	2.4e-11					E	Calvert et al. (2011)		7.55379e-11
1-(4-methyl-cyclohex-3-enyl)-ethanone	4-acetyl-1-methylcyclohexene	9	CC1=CCC(C(C)=O)CC1	1S/C9H14O/c1-7-3-5-9(6-4-7)8(2)10/h3,9H,4-6H2,1-2H3	OH	1.29e-10					P	Atkinson and Aschmann (1993)		1.06184e-10
4-(2,6,6-trimethyl-cyclohex-1-enyl)-but-3-en-2-one	b-ionone	13	CC(C=CC1=C(C)CCCC(C)1C)=O	1S/C13H20O/c1-10-6-5-9-13(3,4)12(10)8-7-11(2)14/h7-8H,5-6,9H2,1-4H3	OH	1.21e-10					E	Calvert et al. (2011)		1.88585e-10
1-(2,3,8,8-tetramethyl-1,2,3,4,5,6,7,8-octahydro-naphthalen-2-yl)-ethanone		16	CC(C1(C)CC2=C(CCCC(C)2C)CC1C)=O	1S/C16H26O/c1-11-9-13-7-6-8-15(3,4)14(13)10-16(11,5)12(2)17/h11H,6-10H2,1-5H3	OH	9.9e-11					E	Calvert et al. (2011)		1.40888e-10
1-(3,6,8,8-Tetramethyl-2,3,4,7,8,8a-hexahydro-1H-3a,7-methano-azulen-5-yl)-ethanone	acetyl-cedrene	17	CC(C2=C(C)[C]3([H])C(C)(C)[C]1([H])CC[CH](C)[C](C3)1C2)=O	1S/C17H26O/c1-10-6-7-15-16(4,5)14-9-17(10,15)8-13(11(14)2)12(3)18/h10,14-15H,6-9H2,1-5H3	OH	7.7e-11					E	Calvert et al. (2011)		9.72301e-11
diketones
3-hexene-2,5-dione (cis)		6	CC(/C=C\C(C)=O)=O	1S/C6H8O2/c1-5(7)3-4-6(2)8/h3-4H,1-2H3/b4-3-	OH	7.2e-11					E	Calvert et al. (2011)		3.182e-11
3-hexene-2,5-dione (trans)		6	CC(/C=C/C(C)=O)=O	1S/C6H8O2/c1-5(7)3-4-6(2)8/h3-4H,1-2H3/b4-3+	OH	5.1e-11					E	Calvert et al. (2011)		3.182e-11
hydroxyketones
4-hydroxy-pent-3-en-2-one		5	CC(C=C(C)O)=O	1S/C5H8O2/c1-4(6)3-5(2)7/h3,6H,1-2H3	OH	8.9e-11	3.27e-12	-985	285	310	E	Calvert et al. (2011)	dominant enol isomer of pentan-2,4-dione	8.86819e-11
4-hydroxy-3-methyl-pent-3-en-2-one		6	CC(C(C)=C(C)O)=O	1S/C6H10O2/c1-4(5(2)7)6(3)8/h7H,1-3H3	OH	6.1e-11					E	Calvert et al. (2011)	dominant enol isomer of 3-methyl-pentan-2,4-dione	1.04934e-10
3,4-dihydroxy-3-hexene-2,5-dione		6	CC(C(O)=C(O)C(C)=O)=O	1S/C6H8O4/c1-3(7)5(9)6(10)4(2)8/h9-10H,1-2H3	OH	2.7e-10					E	Calvert et al. (2011)		8.706e-11
		number of entries
		17

## Sheet: hydroperoxides
Systematic name	Aternative name	Carbon number	SMILES	InChI	Reagent	k(298K)	A	E/R	Lower T	Upper T	Category	Source	Comment	Calculated k(298K)
a,b-unsaturated hydroperoxides
2-hydroperoxy-2-methyl-but-3-en-1-ol	(1,2)-ISOPOOH	5	OCC(C)(OO)C=C	1S/C5H10O3/c1-3-5(2,4-6)8-7/h3,6-7H,1,4H2,2H3	OH	8.3e-11					P	St. Clair et al. (2015)	Based on IUPAC preferred value for k(OH + propene)	6.81608e-11
2-hydroperoxy-3-methyl-but-3-en-1-ol	(4,3)-ISOPOOH	5	OCC(OO)C(=C)C	1S/C5H10O3/c1-4(2)5(3-6)8-7/h5-7H,1,3H2,2H3	OH	1.3e-10					P	St. Clair et al. (2015)	Based on IUPAC preferred value for k(OH + propene)	1.58949e-10
		number of entries
		2

## Sheet: carboxylic acids
Systematic name	Aternative name	Carbon number	SMILES	InChI	Reagent	k(298K)	A	E/R	Lower T	Upper T	Category	Source	Comment	Calculated k(298K)
propenoic acid	acrylic acid	3	C=CC(O)=O	1S/C3H4O2/c1-2-3(4)5/h2H,1H2,(H,4,5)	OH	1.7e-11					E	Calvert et al. (2011)		1.7111e-11
		number of entries
		1

## Sheet: esters
Systematic name	Aternative name	Carbon number	SMILES	InChI	Reagent	k(298K)	A	E/R	Lower T	Upper T	Category	Source	Comment	Calculated k(298K)
acetate esters
ethanoic acid ethenyl ester	vinyl acetate	4	CC(OC=C)=O	1S/C4H6O2/c1-3-6-4(2)5/h3H,1H2,2H3	OH	2.49e-11	4.77e-12	-493	287	313	E	Calvert et al. (2011)		2.8711e-11
ethanoic acid prop-2-enyl ester	allyl acetate	5	CC(OCC=C)=O	1S/C5H8O2/c1-3-4-7-5(2)6/h3H,1,4H2,2H3	OH	2.66e-11	2.29e-12	-731	253	372	E	Calvert et al. (2011)		2.66285e-11
ethanoic acid isopropenyl ester	i-propenyl acetate	5	CC(OC(C)=C)=O	1S/C5H8O2/c1-4(2)7-5(3)6/h1H2,2-3H3	OH	6.72e-11	4.36e-12	-815	243	372	E	Calvert et al. (2011)		5.2472e-11
ethanoic acid pent-4-enyl ester	4-pentenyl acetate	7	CC(OCCCC=C)=O	1S/C7H12O2/c1-3-4-5-6-9-7(2)8/h3H,1,4-6H2,2H3	OH	4.3e-11					E	Calvert et al. (2011)		3.68328e-11
ethanoic acid Z-hex-3-enyl ester	3-hexenyl acetate (cis-)	8	CC(OCC/C=C\CC)=O	1S/C8H14O2/c1-3-4-5-6-7-10-8(2)9/h4-5H,3,6-7H2,1-2H3/b5-4-	OH	7.74e-11					E	Calvert et al. (2011)		6.63158e-11
acrylate esters
propenoic acid methyl ester	methyl acrylate	4	C=CC(OC)=O	1S/C4H6O2/c1-3-4(5)6-2/h3H,1H2,2H3	OH	1.29e-11	2e-12	-556	253	366	E	Calvert et al. (2011)		1.6847e-11
propenoic acid ethyl ester	ethyl acrylate	5	C=CC(OCC)=O	1S/C5H8O2/c1-3-5(6)7-4-2/h3H,1,4H2,2H3	OH	1.59e-11	2.5e-12	-552	255	374	E	Calvert et al. (2011)		1.84283e-11
propenoic acid butyl ester	n-butyl acrylate	7	C=CC(OCCCC)=O	1S/C7H12O2/c1-3-5-6-9-7(8)4-2/h4H,2-3,5-6H2,1H3	OH	1.94e-11	3.74e-13	-1177	287	313	E	Calvert et al. (2011)		2.14601e-11
methacrylate esters
2-methylpropenoic acid methyl ester	methyl methacrylate	5	C=C(C)C(OC)=O	1S/C5H8O2/c1-4(2)5(6)7-3/h1H2,2-3H3	OH	4.07e-11	2.68e-12	-811	255	351	E	Calvert et al. (2011)		2.90287e-11
2-methylpropenoic acid ethyl ester	ethyl methacrylate	6	CC(C(OCC)=O)=C	1S/C6H10O2/c1-4-8-6(7)5(2)3/h2,4H2,1,3H3	OH	4.3e-11					E	Calvert et al. (2011)		3.061e-11
2-methylpropenoic acid butyl ester	n-butyl methacrylate	8	CC(C(OCCCC)=O)=C	1S/C8H14O2/c1-4-5-6-10-8(9)7(2)3/h2,4-6H2,1,3H3	OH	6.58e-11	2.44e-11	-982	255	351	E	Calvert et al. (2011)		3.36418e-11
lactones (cyclic esters)
3H-furan-2-one		4	O=C1OC=CC1	1S/C4H4O2/c5-4-2-1-3-6-4/h1,3H,2H2	OH	4.42e-11					E	Calvert et al. (2011)		5.21016e-11
5-methyl 3H-furan-2-one	a-angelica lactone	5	O=C1OC(C)=CC1	1S/C5H6O2/c1-4-2-3-5(6)7-4/h2H,3H2,1H3	OH	6.78e-11					E	Calvert et al. (2011)		7.63436e-11
		number of entries
		13

## Sheet: nitrogen-containing
Systematic name	Aternative name	Carbon number	SMILES	InChI	Reagent	k(298K)	A	E/R	Lower T	Upper T	Category	Source	Comment	Calculated k(298K)
acyclic alkenyl dinitrates
cis-1,4-dinitrooxy-2-butene		4	O=[N+](OC\C=C/CO[N+]([O-])=O)[O-]	1S/C4H6N2O6/c7-5(8)11-3-1-2-4-12-6(9)10/h1-2H,3-4H2/b2-1-	OH	1.4e-11					E	Calvert et al. (2011)		1.41947e-11
3,4-dinitrooxy-1-butene		4	C=CC(O[N+]([O-])=O)CO[N+]([O-])=O	1S/C4H6N2O6/c1-2-4(12-6(9)10)3-11-5(7)8/h2,4H,1,3H2	OH	9.32e-12					E	Calvert et al. (2011)		8.547e-12
hydroxyalkenyl nitrates
1-nitrooxy-but-3-en-2-ol		4	C=CC(O)CO[N+]([O-])=O	1S/C4H7NO4/c1-2-4(6)3-9-5(7)8/h2,4,6H,1,3H2	OH	3.62e-11					E	Calvert et al. (2011)		3.76356e-11
4-nitrooxy-but-2-en-1-ol		4	OCC=CCO[N+]([O-])=O	1S/C4H7NO4/c6-3-1-2-4-9-5(7)8/h1-2,6H,3-4H2	OH	2.2e-11					E	Calvert et al. (2011)		6.22135e-11
2-methyl-4-nitrooxy-but-2-en-1-ol (trans)		5	OC/C(C)=C/CO[N+]([O-])=O	1S/C5H9NO4/c1-5(4-7)2-3-10-6(8)9/h2,7H,3-4H2,1H3/b5-2+	OH	1e-10					P	Lee et al. (2014)		1.07848e-10
2-methyl-4-nitrooxy-but-2-en-1-ol (cis)		5	C/C(CO)=C/CO[N+]([O-])=O	1S/C5H9NO4/c1-5(4-7)2-3-10-6(8)9/h2,7H,3-4H2,1H3/b5-2-	OH	1.1e-10					P	Lee et al. (2014)		1.07848e-10
3-methyl-2-nitrooxybut-3-ene-1-ol		5	C=C(C)C(O[N+]([O-])=O)CO	1S/C5H9NO4/c1-4(2)5(3-7)10-6(8)9/h5,7H,1,3H2,2H3	OH	3.9e-11					P	Jacobs et al. (2014); Lee et al. (2014)		3.13175e-11
2-methyl-1-nitrooxy-but-3-en-2-ol		5	C=CC(O)(C)CO[N+]([O-])=O	1S/C5H9NO4/c1-3-5(2,7)4-10-6(8)9/h3,7H,1,4H2,2H3	OH	3.4e-11					P	Paulot et al. (2009)		3.34272e-11
3-methyl-1-nitrooxy-but-3-en-2-ol		5	C=C(C)C(O)CO[N+]([O-])=O	1S/C5H9NO4/c1-4(2)5(7)3-10-6(8)9/h5,7H,1,3H2,2H3	OH	6.6e-11					P	Paulot et al. (2009)		6.51766e-11
nitro-oxy alkenals
2-methyl-4-nitrooxy-2-buten-1-al (trans)		5	O=C/C(C)=C/CO[N+]([O-])=O	1S/C5H7NO4/c1-5(4-7)2-3-10-6(8)9/h2,4H,3H2,1H3/b5-2+	OH	4.1e-11					P	Xiong et al. (2016)		3.42649e-11
peroxyacyl nitrates
peroxymethacryloyl nitrate	MPAN	4	C=C(C)C(OO[N+]([O-])=O)=O	1S/C4H5NO5/c1-3(2)4(6)9-10-5(7)8/h1H2,2H3	OH	2.9e-11					E	IUPAC (August 2007)		2.873e-11
nitroalkenes
nitroethene		2	C=C[N+]([O-])=O	1S/C2H3NO2/c1-2-3(4)5/h2H,1H2	OH	1.2e-12					P	Nielsen et al. (1990)		4.2e-12
3-nitropropene		3	C=CC[N+]([O-])=O	1S/C3H5NO2/c1-2-3-4(5)6/h2H,1,3H2	OH	1.22e-11					P	Nielsen et al. (1990)		1.22e-11
1-nitrocyclohexene		6	O=[N+](C1=CCCCC1)[O-]	1S/C6H9NO2/c8-7(9)6-4-2-1-3-5-6/h4H,1-3,5H2	OH	4.37e-11					P	Nielsen et al. (1990)		3.03301e-11
		number of entries
		14	O=[N+](OC\C=C/CO[N+]([O-])=O)[O-]
