# Supplementary material for: Estimation of rate coefficients and branching ratios for gas-phase reactions of OH with aliphatic organic compounds for use in automated mechanism construction
Source: Copernicus journal article supplement (doi:10.5194/acp-18-9297-2018), 2018-07-04
Supplement: Supplementary file 2 [file acp-18-9297-2018-supplement.zip › SI_5_OH_alkyne and alkynol_preferred data.xls]

## Sheet: Notes
Pressure independent rate coefficients for OH + organic compounds
Rate coefficients in the form: k = A.exp(-E/RT) (i)
Notes on data table columns
Systematic name	systematic name of organic compound, usually based on IUPAC nomenclature
Alternative name	alternative/common names for organic compound
Carbon number	the number of carbon atoms in the organic compound
SMILES:	SMILES notation for organic compound				http://www.daylight.com/smiles/index.html
InChI:	InChI notation for organic compound				http://iupac.org/who-we-are/divisions/division-details/inchi/
k(298K):	rate coefficient at 298 K in cm3 molecule-1 s-1
A:	cm3 molecule-1 s-1
E/R:	K
Lower T	Lower bound of valid temperature range (K)
Upper T	Upper bound of valid temperature range (K)
Category:	E = evaluation; P = published; G = grey literature
Source	Source reference
Comment:	Any further information influencing the preferred value
Calculated k(298K):	rate coefficient calculated by SAR at 298 K in cm3 molecule-1 s-1
Pressure dependent rate coefficients for OH + organic compounds
Notation of temperature and pressure dependent third order rate coefficients follow the conventions as outlined in the IUPAC Guide to Data Sheets (section 1.3)
http://iupac.pole-ether.fr/htdocs/supp_info/Guide_2001.pdf
The third order rate coefficient is obtained from the following Lindemann-Hinshelwood equation which includes a broadening factor F:
where:
where:	log = log10
	N = [0.75 – 1.27 logFc]
Additional notes on data table columns
k0:	cm3 molecule-1 s-1
[M]	gas density in molecule cm-3
k¥:	cm3 molecule-1 s-1
Fc:	unitless
k(298K, 1 bar):	rate coefficient at 298 K and 1 bar in cm3 molecule-1 s-1

## Sheet: References
References
Atkinson and Aschmann (1984)	Atkinson, R. and Aschmann, S. M.: Rate constants for the reactions of O3 and OH with a series of alkynes. Int. J. Chem. Kinet., 16, 259-268, 1984.
Boodaghians et al. (1987)	Boodaghians, R. B., Hall, I. W., Toby, F. S. and Wayne, R. P.: Absolute determinations of the kinetics and temperature dependences of the reactions of OH with a series of alkynes. J. Chem. Soc., Faraday Trans. II, 83, 2073-2080, 1987.
Calvert et al. (2011)	Calvert, J. G., Mellouki, A., Orlando, J. J., Pilling, M. J. and Wallington, T. J.: The mechanisms of atmospheric oxidation of the oxygenates, Oxford University Press, Oxford. ISBN 978-0-19976707-6, 2011.
Gibilisco et al. (2015)	Gibilisco, R. G., Kieninger, M., Ventura, O. N., and Teruel, M. A.:Atmospheric reactivity of HCºCCH2OH (2-propyn-1-ol) toward OH radicals: experimental determination and theoretical comparison with its alkyne analogue, RSC Adv., 5, 106668-106679, 2015.
Hatekayama et al. (1986)	Hatakeyama, S., Washida, N. and Akimoto, H.: Rate constants and mechanism for the reaction of OH (OD) radicals with acetylene, propyne and 2-butyne in air at 297 K, J. Phys. Chem., 90, 173-178, 1986.
IUPAC (Date)	Preferred value of the IUPAC Task Group on Atmospheric Chemical Kinetic Data Evaluation, http://iupac.pole-ether.fr/, in September 2017 ("Date" indicates date of evaluation of specific reaction)
Lockhart et al. (2013)	Lockhart, J., Blitz, M. A., Heard, D. E., Seakins, P. W. and Shannon, R. J.: Mechanism of the reaction of OH with alkynes in the presence of oxygen, J. Phys. Chem. A, 117, 5407-5418.
Taylor et al. (2008)	Taylor, S. E., Goddard, A., Blitz, M. A., Cleary, P. A., Heard, D. E.: Pulsed Laval nozzle study of the kinetics of OH with unsaturated hydrocarbons at very low temperatures, Phys. Chem. Chem. Phys., 10, 422-437, 2008.

## Sheet: alkynes
Systematic name	Aternative name	Carbon number	SMILES	InChI	Reagent	k(298K)	A	E/R	Lower T	Upper T		Category	Source	Comment	Calculated k(298K)
ethyne	acetylene	2	C#C	1S/C2H2/c1-2/h1-2H	OH	a 1.00E-12						E	IUPAC (July 2005)	a Based on recommended expression for high pressure limit: k = 1.00E-12. See below for full set of parameters.	9.4e-13
propyne		3	C#CC	1S/C3H4/c1-3-2/h1H,2H3	OH	4.23e-12						E	see comment	Based on mean of rate coefficients of Atkinson and Aschmann (1984), Hatekayama et al. (1986), Boodaghians et al. (1987), Taylor et al. (2008) and Lockhart et al. (2013)	4.642e-12
but-1-yne		4	C#CCC	1S/C4H6/c1-3-4-2/h1H,4H2,2H3	OH	8.94e-12						E	see comment	Based on mean of rate coefficients of Atkinson and Aschmann (1984) and Boodaghians et al. (1987)	8.4645e-12
but-2-yne		4	CC#CC	1S/C4H6/c1-3-4-2/h1-2H3	OH	2.35e-11						E	see comment	Based on mean of rate coefficients of Hatekayama et al. (1986), Boodaghians et al. (1987) and Lockhart et al. (2013)	2.19176e-11
pent-1-yne		5	C#CCCC	1S/C5H8/c1-3-5-4-2/h1H,4-5H2,2H3	OH	9.62e-12						P	Boodaghians et al. (1987)	Value scaled to be consistent with but-1-yne recommendation at 298 K	9.7718e-12
hex-1-yne		6	C#CCCCC	1S/C6H10/c1-3-5-6-4-2/h1H,4-6H2,2H3	OH	1.08e-11						P	Boodaghians et al. (1987)	Value scaled to be consistent with but-1-yne recommendation at 298 K	1.11733e-11
		number of entries
		6
Pressure-dependent expressions
Systematic name	Aternative name	Carbon number	SMILES	InChI	Reagent	k (298 K, 1 bar)	k0	k¥	Fc	Lower T	Upper T	Category	Source	Comment
ethyne	acetylene	2	C#C	1S/C2H2/c1-2/h1-2H	OH	7.5e-13	5.00E-30 (T/300)-1.5 [M]	1e-12	0.37	300	800	E	IUPAC (July 2005)

## Sheet: alkynols
Systematic name	Aternative name	Carbon number	SMILES	InChI	Reagent	k(298K)	A	E/R	Lower T	Upper T		Category	Source	Comment	Calculated k(298K)
prop-2-yn-1-ol		3	C#CCO	1S/C3H4O/c1-2-3-4/h1,4H,3H2	OH	2.05e-11						P	Gibilisco et al. (2015)		1.87004e-11
3,5-dimethyl-hex-1-yn-3-ol		8	C#CC(O)(C)CC(C)C	1S/C8H14O/c1-5-8(4,9)6-7(2)3/h1,7,9H,6H2,2-4H3	OH	2.9e-11						E	Calvert et al. (2011)		3.19765e-11
		number of entries
		2
